# Supplementary material
Source: HighWire-hosted journal article supplement (https://gut.bmj.com/content/71/10/2022)
Supplement: inline-supplementary-material-1 [file inline-supplementary-material-1.pdf]

**Supplementary Table 1. Adjusted odds ratios of CRC associated with polyp type on the first colonoscopy in men**

| Polyp category              | Cases,<br>n (%) <sup>a</sup> | Controls,<br>n (%) <sup>a</sup> | Unadjusted<br>OR (95%<br>CI) | Adjusted<br>OR <sup>b</sup> (95%<br>CI) | P value |
|-----------------------------|------------------------------|---------------------------------|------------------------------|-----------------------------------------|---------|
| <b>No polyp</b>             | 121 (36.6)                   | 841 (50.8)                      | 1.0<br>(Reference)           | 1.0<br>(Reference)                      |         |
| <b>SSL</b>                  |                              |                                 |                              |                                         |         |
| SSL alone                   | 8 (2.4)                      | 31 (1.9)                        | 1.7 (0.8-3.8)                | 1.7 (0.8-3.8)                           | 0.20    |
| SSL + adenoma               | 13 (3.9)                     | 30 (1.8)                        | 3.0 (1.5-5.8)                | 2.9 (1.5-5.7)                           | 0.002   |
| <b>HP</b>                   |                              |                                 |                              |                                         |         |
| HP alone                    | 6 (1.8)                      | 77 (4.7)                        | 0.5 (0.2-1.2)                | 0.5 (0.2-1.2)                           | 0.13    |
| HP + adenoma                | 16 (4.8)                     | 101 (6.1)                       | 1.1 (0.6-1.9)                | 1.1 (0.6-1.9)                           | 0.78    |
| <b>TSA</b>                  |                              |                                 |                              |                                         |         |
| TSA alone                   | 0 (0.0)                      | 2 (0.1)                         | 0.0 (0.0-I)                  | 0.0 (0.0-I)                             | 0.98    |
| TSA + adenoma               | 5 (1.5)                      | 3 (0.2)                         | 12.4 (2.9-<br>52.8)          | 12.2 (2.9-<br>51.9)                     | 0.0007  |
| <b>Unspecific SP</b>        |                              |                                 |                              |                                         |         |
| Unspecified SP<br>alone     | 7 (2.1)                      | 43 (2.6)                        | 1.1 (0.5-2.6)                | 1.0 (0.5-2.4)                           | 0.92    |
| Unspecified SP +<br>adenoma | 11 (3.3)                     | 36 (2.2)                        | 2.1 (1.0-4.2)                | 2.1 (1.0-4.2)                           | 0.04    |

|                                   |            |            |               |               |          |
|-----------------------------------|------------|------------|---------------|---------------|----------|
| <b>Conventional adenoma alone</b> | 144 (43.5) | 491 (29.7) | 2.0 (1.5-2.6) | 2.0 (1.6-2.7) | <0.00001 |
|-----------------------------------|------------|------------|---------------|---------------|----------|

<sup>a</sup>Percentage was regarding the total number of cases or controls

<sup>b</sup>Adjusted for age, sex and year of first colonoscopy (within 1 year)

Abbreviations: CRC, colorectal cancer; HP, hyperplastic polyp; SSL, sessile serrated lesion;

TSA, traditional serrated adenoma; SP, serrated polyp; OR, odds ratio

**Supplementary Table 2. Adjusted odds ratios of CRC associated with polyp type on the first colonoscopy in women**

| <b>Polyp category</b> | <b>Cases, n (%)<sup>a</sup></b> | <b>Controls, n (%)<sup>a</sup></b> | <b>Unadjusted OR (95% CI)</b> | <b>Adjusted OR<sup>b</sup> (95% CI)</b> | <b>P value</b> |
|-----------------------|---------------------------------|------------------------------------|-------------------------------|-----------------------------------------|----------------|
| <b>No polyp</b>       | 162 (44.5)                      | 1180 (64.8)                        | 1.0<br>(Reference)            | 1.0<br>(Reference)                      |                |
| <b>SSL</b>            |                                 |                                    |                               |                                         |                |
| SSL alone             | 17 (4.7)                        | 29 (1.6)                           | 4.2 (2.3-7.9)                 | 4.4 (2.3-8.2)                           | <0.00001       |
| SSL + adenoma         | 15 (4.1)                        | 16 (0.9)                           | 6.8 (3.3-13.9)                | 7.1 (3.4-14.7)                          | <0.00001       |
| <b>HP</b>             |                                 |                                    |                               |                                         |                |

|                                       |            |            |                |                |          |
|---------------------------------------|------------|------------|----------------|----------------|----------|
| HP alone                              | 12 (3.3)   | 84 (4.6)   | 1.0 (0.6-2.0)  | 1.1 (0.6-2.0)  | 0.87     |
| HP + adenoma                          | 15 (4.1)   | 53 (2.9)   | 2.2 (1.2-4.0)  | 2.0 (1.1-3.7)  | 0.03     |
| <b>TSA</b>                            |            |            |                |                |          |
| TSA alone                             | 0 (0.0)    | 2 (0.1)    | 0.0 (0.0-I)    | 0.0 (0.0-I)    | 0.98     |
| TSA + adenoma                         | 1 (0.3)    | 2 (0.1)    | 4.0 (0.4-45.3) | 3.9 (0.3-43.3) | 0.27     |
| <b>Unspecific SP</b>                  |            |            |                |                |          |
| Unspecified SP<br>alone               | 15 (4.1)   | 40 (2.2)   | 2.8 (1.5-5.2)  | 2.8 (1.5-5.2)  | 0.001    |
| Unspecified SP +<br>adenoma           | 12 (3.3)   | 28 (1.5)   | 3.4 (1.7-6.9)  | 3.3 (1.6-6.7)  | 0.001    |
| <b>Conventional<br/>adenoma alone</b> | 115 (31.6) | 386 (21.2) | 2.2 (1.7- 2.9) | 2.2 (1.7-2.9)  | <0.00001 |

<sup>a</sup>Percentage was regarding the total number of cases or controls

Abbreviations: CRC, colorectal cancer; HP, hyperplastic polyp; SSL, sessile serrated lesion;

TSA, traditional serrated adenoma; SP, serrated polyp; OR, odds ratio

**Supplementary Table 3. Adjusted odds ratios of CRC associated with SSLs and HPs by location and size in comparison to individuals with no polyp<sup>a</sup>**

| Polyp category | Cases,<br>n (%) | Controls,<br>n (%) | Unadjusted<br>OR (95% CI) | Adjusted OR<br>(95% CI) <sup>b</sup> | P value |
|----------------|-----------------|--------------------|---------------------------|--------------------------------------|---------|
| No polyp       | 283 (43.5)      | 2021 (60.7)        | (Reference)               | (Reference)                          |         |
| <b>SSL</b>     |                 |                    |                           |                                      |         |

|                       |          |           |                 |                 |        |
|-----------------------|----------|-----------|-----------------|-----------------|--------|
| Proximal, large       | 10 (1.5) | 8 (0.2)   | 12.6 (3.5-46.2) | 12.8 (3.5-46.9) | 0.0001 |
| Proximal, small       | 8 (1.2)  | 22 (0.7)  | 1.8 (0.7-4.5)   | 1.9 (0.8-4.7)   | 0.18   |
| Distal, large         | 1 (0.2)  | 0 (0)     | -               | -               | 0.98   |
| Distal, small         | 3 (0.5)  | 21 (0.6)  | 0.8 (0.2-3.1)   | 0.8 (0.2-3.0)   | 0.77   |
| <b>HP</b>             |          |           |                 |                 |        |
| Proximal, large       | 0        | 0         | -               | -               | -      |
| Proximal, small       | 1 (0.1)  | 17 (0.5)  | 0.4 (0.0-3.5)   | 0.5 (0.1-3.9)   | 0.47   |
| Distal, large         | 0        | 5 (0.1)   | 0.0 (0.0-I)     | 0.0 (0.0-I)     | 0.98   |
| Distal, small         | 12 (1.7) | 119 (3.4) | 0.8 (0.4-1.5)   | 0.8 (0.4-1.5)   | 0.49   |
| <b>Unspecified SP</b> |          |           |                 |                 |        |
| Proximal, large       | 1 (0.1)  | 1 (0.03)  | -               | -               | 0.99   |
| Proximal, small       | 10 (1.4) | 18 (0.5)  | 4.3 (1.6-11.5)  | 4.2 (1.6-11.4)  | 0.005  |
| Distal, large         | 0        | 0         | -               | -               | -      |
| Distal, small         | 7 (1.0)  | 48 (1.4)  | 0.9 (0.4-2.2)   | 0.9 (0.4-2.2)   | 0.84   |

<sup>a</sup> Polyps with unknown size are not listed

<sup>b</sup> Adjusted for age, sex and year of first colonoscopy (within 1 year)

Abbreviations: CRC, colorectal cancer; HP, hyperplastic polyp; SSL, sessile serrated lesion; TSA, traditional serrated adenoma; SP, serrated polyp; OR; odds ratio; I, indefinite.

**Supplementary Table 4. Adjusted odds ratios of CRC stratified by age groups**

| Polyp category | Cases,<br>n (%) | Controls,<br>n (%) | Unadjusted<br>OR (95% CI) | Adjusted OR<br>(95% CI) <sup>a</sup> | P value |
|----------------|-----------------|--------------------|---------------------------|--------------------------------------|---------|
|----------------|-----------------|--------------------|---------------------------|--------------------------------------|---------|

|                              |               |                |                    |                    |         |
|------------------------------|---------------|----------------|--------------------|--------------------|---------|
| <b>Age 50-69 years</b>       |               |                |                    |                    |         |
| No polyp                     | 160<br>(39.2) | 1186<br>(58.6) | 1.0<br>(Reference) | 1.0<br>(Reference) | .       |
| SSL                          |               |                |                    |                    |         |
| SSL alone                    | 12 (2.9)      | 36 (1.8)       | 2.4 (1.2- 4.7)     | 2.4 (1.2- 4.8)     | 0.012   |
| SSL + adenoma                | 14 (3.4)      | 25 (1.2)       | 4.3 (2.2- 8.4)     | 4.4 (2.2- 8.6)     | 0.00002 |
| HP                           |               |                |                    |                    |         |
| HP alone                     | 11 (2.7)      | 110 (5.4)      | 0.8 (0.4- 1.4)     | 0.8 (0.4- 1.5)     | 0.41    |
| HP + adenoma                 | 18 (4.4)      | 91 (4.5)       | 1.6 (0.9- 2.7)     | 1.5 (0.9- 2.6)     | 0.15    |
| TSA + adenoma                | 3 (0.7)       | 4 (0.2)        | 6.0 (1.3-27.4)     | 6.1 (1.4-27.8)     | 0.02    |
| Unspecified SP               |               |                |                    |                    |         |
| Unspecified SP alone         | 16 (3.9)      | 51 (2.5)       | 2.4 (1.3- 4.3)     | 2.4 (1.3- 4.3)     | 0.005   |
| Unspecified SP + adenoma     | 13 (3.2)      | 31 (1.5)       | 3.2 (1.6- 6.2)     | 3.1 (1.6- 6.0)     | 0.001   |
| Conventional adenoma alone   | 161<br>(39.5) | 491 (24.2)     | 2.5 (1.9- 3.2)     | 2.5 (1.9- 3.2)     | <0.0001 |
| <b>Age 70 years or older</b> |               |                |                    |                    |         |
| No polyp                     | 123<br>(42.9) | 835 (57.6)     | 1.0<br>(Reference) | 1.0<br>(Reference) | .       |
| SSL                          |               |                |                    |                    |         |
| SSL alone                    | 13 (4.5)      | 24 (1.7)       | 3.4 (1.7- 6.9)     | 3.4 (1.7- 6.9)     | 0.0006  |
| SSL + adenoma                | 14 (4.9)      | 21 (1.4)       | 4.4 (2.2- 8.8)     | 4.3 (2.1- 8.8)     | 0.00005 |
| HP                           |               |                |                    |                    |         |
| HP alone                     | 7 (2.4)       | 51 (3.5)       | 0.9 (0.4- 2.0)     | 0.9 (0.4- 2.1)     | 0.83    |
| HP + adenoma                 | 13 (4.5)      | 63 (4.3)       | 1.4 (0.7- 2.7)     | 1.4 (0.7- 2.7)     | 0.31    |
| TSA                          |               |                |                    |                    |         |
| TSA alone                    |               | 4 (0.3)        | 0.0 (0.0- I)       | 0.0 (0.0- I)       | 0.98    |
| TSA + adenoma                | 3 (1.0)       | 1 (0.1)        | 22.4 (2.3- 218)    | 22.1 (2.3- 216)    | 0.008   |
| Unspecified SP               |               |                |                    |                    |         |
| Unspecified SP alone         | 6 (2.1)       | 32 (2.2)       | 1.2 (0.5- 3.0)     | 1.2 (0.5- 2.9)     | 0.71    |
| Unspecified SP + adenoma     | 10 (3.5)      | 33 (2.3)       | 2.1 (1.0- 4.4)     | 2.2 (1.0- 4.6)     | 0.04    |
| Conventional adenoma alone   | 98 (34.1)     | 386 (26.6)     | 1.7 (1.3- 2.3)     | 1.7 (1.3- 2.4)     | 0.0003  |

<sup>b</sup> Adjusted for age, sex and year of first colonoscopy (within 1 year)

<sup>a</sup> Adjusted for age, sex and year of first colonoscopy (within 1 year)

Abbreviations: CRC, colorectal cancer; HP, hyperplastic polyp; SSL, sessile serrated lesion;

TSA, traditional serrated adenoma; SP, serrated polyp; OR; odds ratio; I, indefinite

**Supplementary Table 5. Adjusted odds ratios of CRC associated with SSLs in the proximal vs. distal colon compared to individuals with no polyp<sup>a</sup>**

| Polyp category                       | Cases,<br>n (%) | Controls,<br>n (%) | Unadjusted<br>OR (95%<br>CI) | Adjusted<br>OR (95%<br>CI) <sup>b</sup> | P value |
|--------------------------------------|-----------------|--------------------|------------------------------|-----------------------------------------|---------|
| <b>SSL by location</b>               |                 |                    |                              |                                         |         |
| No polyp<br>(Reference)              | 283<br>(84.2)   | 2021 (95.0)        | 1.0<br>(Reference)           | 1.0<br>(Reference)                      |         |
| Proximal SSL alone                   | 18 (5.4)        | 30 (1.4)           | 3.4 (1.7-6.8)                | 3.5 (1.8-6.9)                           | 0.0003  |
| Proximal SSL +<br>adenoma            | 17 (5.1)        | 19 (0.9)           | 8.5 (3.3-22.1)               | 8.4 (3.2-21.7)                          | <.0001  |
| Distal SSL alone                     | 4 (1.2)         | 20 (0.9)           | 1.3 (0.4- 4.3)               | 1.3 (0.4-4.1)                           | 0.70    |
| Distal SSL +<br>adenoma              | 2 (0.6)         | 11 (0.5)           | 1.1 (0.2-5.5)                | 1.1 (0.2-5.8)                           | 0.89    |
| Proximal and distal<br>SSL alone     | 3 (0.9)         | 9 (0.4)            | 1.7 (0.4-7.1)                | 1.8 (0.4-7.6)                           | 0.45    |
| Proximal and distal<br>SSL + adenoma | 9 (2.7)         | 16 (0.8)           | 10.2 (2.7-<br>37.8)          | 10.4 (2.8-<br>38.8)                     | 0.0005  |

<sup>a</sup> Proximal is defined as any location proximal to the rectum; distal is defined as rectum only.

<sup>b</sup> Adjusted for age, sex and year of first colonoscopy (within 1 year)

Abbreviations: CRC, colorectal cancer; HP, hyperplastic polyp; SSL, sessile serrated lesion;

TSA, traditional serrated adenoma; SP, serrated polyp; OR; odds ratio; I, indefinite

**Supplementary Table 6. Adjusted odds ratios of CRC associated with the total number of SSLs and conventional adenomas**

| Polyp category                        | Cases,<br>n (%) | Controls,<br>n (%) | Unadjusted<br>OR (95%<br>CI) | Adjusted<br>OR (95%<br>CI) <sup>a</sup> | P value |
|---------------------------------------|-----------------|--------------------|------------------------------|-----------------------------------------|---------|
| No polyp<br>(Reference)               | 283 (40.7)      | 2021<br>(58.2)     | 1.0<br>(Reference)           | 1.0<br>(Reference)                      |         |
| Total number of<br>SSL and<br>adenoma |                 |                    |                              |                                         |         |
| 1                                     | 19 (5.7)        | 41 (1.9)           | 2.8 (1.5-5.2)                | 2.8 (1.5-5.3)                           | 0.001   |
| 2                                     | 9 (2.7)         | 33 (1.6)           | 1.8 (0.7-4.3)                | 1.8 (0.8-4.5)                           | 0.18    |
| 3                                     | 10 (3.0)        | 11 (0.5)           | 6.1 (2.2-<br>17.2)           | 6.1 (2.1-<br>17.3)                      | 0.0007  |
| 4+                                    | 15 (4.5)        | 21 (1.0)           | 9.9 (3.5-<br>27.6)           | 9.9 (3.5-<br>27.8)                      | <.0001  |

<sup>a</sup> Adjusted for age, sex and year of first colonoscopy (within 1 year)

Abbreviations: CRC, colorectal cancer; SSL, sessile serrated lesion; OR, odds ratio

**Supplementary Table 7. Adjusted odds ratios of CRC associated with SSLs and synchronous nonadvanced vs. advanced adenomas**

| Polyp category | Cases,<br>n (%) | Controls,<br>n (%) | Unadjusted<br>OR (95%<br>CI) | Adjusted<br>OR (95%<br>CI) <sup>a</sup> | P value |
|----------------|-----------------|--------------------|------------------------------|-----------------------------------------|---------|
| No polyp       | 283 (84.0)      | 2021<br>(94.7)     | 1.0<br>(Reference)           | 1.0<br>(Reference)                      |         |

| SSL                        |          |          |                 |                 |        |
|----------------------------|----------|----------|-----------------|-----------------|--------|
| SSL alone                  | 25 (7.4) | 60 (2.8) | 2.5 (1.4-4.3)   | 2.5 (1.5-4.4)   | 0.001  |
| SSL + non-advanced adenoma | 12 (3.6) | 32 (1.5) | 3.7 (1.6-8.7)   | 3.6 (1.5-8.6)   | 0.003  |
| SSL + advanced adenoma     | 16 (4.8) | 14 (0.7) | 11.1 (4.0-30.6) | 11.6 (4.2-32.3) | <.0001 |

<sup>a</sup> Adjusted for age, sex and year of first colonoscopy (within 1 year)

Abbreviations: CRC, colorectal cancer; SSL, sessile serrated lesion; OR; odds ratio
